# Supplementary material for: Past and new challenges for malaria control and elimination: the role of operational research for innovation in designing interventions
Source: PubMed Central journal article supplement (PMC4504133; doi:10.1186/s12936-015-0802-4), 2015-07-17
Supplement: 12936_2015_802_MOESM1_ESM.pdf [file 12936_2015_802_MOESM1_ESM.pdf]

| Name            | Surname                    | Organization                                                          |
|-----------------|----------------------------|-----------------------------------------------------------------------|
| Dr. Victor      | Kaput Makwenge             | Honorary Minister of Health, Democratic Republic of Congo             |
| Prof. Graham    | Brown                      | Nossal Institute for Global Health, the University of Melbourne       |
| Dr. Wichai      | Satimai                    | Department of Disease Control, Ministry of Public Health, Thailand    |
| Mr. Alastair    | Robb                       | Department for International Development, UK                          |
| Dr. Bernard     | Nahlen                     | President's Malaria Initiative, USAID                                 |
| Ms. Valentina   | Buj                        | UNICEF                                                                |
| Sanne Henrietta | Fournier - Wendes          | UNITAID                                                               |
| Dr. Sébastien   | Marcombe                   | Institut Pasteur du Laos                                              |
| Dr. Didier      | Fontenille                 | Institut Pasteur du Cambodge                                          |
| Dr. Didier      | Ménard                     | Institut Pasteur du Cambodge                                          |
| Prof. François  | Nosten                     | Oxford, Shoklo Malaria Research Unit, Mae Sot, Thailand               |
| Dr. Sébastien   | Boyer                      | Institut Pasteur de Madagascar                                        |
| Dr. Leonardo    | Basco                      | Institut de Recherche pour le Développement                           |
| Dr. Philippe    | Guérin                     | WWARN                                                                 |
| Dr. Mehul       | Dhorda                     | WWARN                                                                 |
| Mr. Jeffery     | Smith                      | WWARN                                                                 |
| Dr. Jean        | Gaudart                    | Aix-Marseille-Université                                              |
| Dr. Thomas      | Teuscher                   | Roll Back Malaria                                                     |
| Jacques         | Berger                     | Institut de Recherche pour le Développement                           |
| Nadine          | Fievet                     | Institut de Recherche pour le Développement                           |
| Dr. Bouasy      | Hongvanthong               | Centre for Malaria Parasitology and Entomology, Lao PDR               |
| Dr. Siv         | Sovannaroth                | National Malaria Center, Cambodia                                     |
| Dr. Aung        | Thi                        | Department of Health, Ministry of Public Health, Myanmar              |
| Dr. Jetsumon    | Sattabongkot<br>Prachumsri | Faculty of Tropical Medicine<br>Mahidol University, Bangkok, Thailand |

|                |             |                                                    |
|----------------|-------------|----------------------------------------------------|
| Dr. Vincent    | Corbel      | Institut de Recherche pour le Développement        |
| Véronique      | Sinou       | Université Aix-Marseille                           |
| Dr. Fatoumata  | Nafo-Traore | Roll Back Malaria                                  |
| Prof. Marc     | Coosemans   | Institute of Tropical Medicine, Antwerp, Belgium.  |
| Prof. Nick     | White       | Mahidol-Oxford Tropical Medicine Research Unit     |
| Arjen          | Dondorp     | Mahidol-Oxford Tropical Medicine Research Unit     |
| Dr. Shunmay    | Yeung       | London School of Hygiene and Tropical Medicine     |
| Dr. Deyer      | Gopinath    | WHO Thailand                                       |
| Natakorn       | Jittanonta  | Malaria Consortium Thailand                        |
| Rush           | Ashton      | Malaria Consortium Cambodia                        |
| Dr. Hnin Su Su | Khin        | PSI Myanmar                                        |
| Ms. Abigail    | Pratt       | PSI Myanmar                                        |
| Dr. Myo Kyaw   | Lwin        | Save the Children Myanmar                          |
| Attila         | Molnar      | UNOPS Myanmar                                      |
| Mr. Michael    | O'Dwyer     | AUSAID                                             |
| Ben            | Rolfe       | Asia Pacific Leaders Malaria Alliance              |
| Dr. Sandii     | Lwin        | Myanmar Health and Development Consortium          |
| Amélie         | Joubert     | RAI Regional Steering Committee, WHO               |
| Ms. Izaskun    | Gaviria     | The Global Fund                                    |
| Dr. Sally      | Stansfield  | Deloitte Consulting                                |
| Dr. Vanessa    | Racloz      | Global Malaria Action Plan, WHO - GMAP 2           |
| Dr. Helen      | Prytherch   | Swiss Tropical and Public Health Institute - GMAP2 |
| Dr. Nicolaus   | Lorenz      | Swiss Tropical Institute                           |
| Dr. François   | Desbrandes  | Sanofi Aventis                                     |
| André          | Tchouatieu  | Sanofi Aventis                                     |
| Dr. Louis      | Da Gama     | Global Health Advocates                            |

|                |                 |                                                                                                |
|----------------|-----------------|------------------------------------------------------------------------------------------------|
| Dr. Promboon   | Panitchpakdi    | Raks Thai Foundation                                                                           |
| Nou            | Sanann          | FHI 360                                                                                        |
| Dr. Lorenz     | Von Seidlein    | Mahidol-Oxford Tropical Medicine Research Unit                                                 |
| Bob            | Taylor          | Mahidol-Oxford Tropical Medicine Research Unit                                                 |
| Dr. Hans       | Hovergaard      | Norwegian University of Life Sciences                                                          |
| Prof. Srivicha | Krudsood        | Faculty of Tropical Medicine, Mahidol University                                               |
| Khun Anusorn   | Pawaputanun     | Ministry of Public Health, Thailand                                                            |
| Dr. Anupong    | Sujariyakul     | Ministry of Public Health, Thailand                                                            |
| Dr. Hubert     | Barennes        | Institut Pasteur du Cambodge                                                                   |
| Prom           | Chanrith        | KHANA                                                                                          |
| Dr. Joel       | Tarning         | Mahidol Oxford Tropical Medicine Research Unit, Faculty of Tropical Medicine, Mahidol          |
| Dr. Jeeraphat  | Sirichaisinthop | Department of Disease Control, Ministry of Public Health, Thailand                             |
| Le Thi Kim     | Chi             | RESED CENTER                                                                                   |
| Dr. Oahn       | Khuat           | Center for Supporting Community Development Initiatives (SCDI)                                 |
| Rima           | Shretta         | Malaria Elimination Initiative<br>Global Health Group, University of California, San Francisco |
| Prof. Maxine   | Whittaker       | Asia Pacific Malaria Elimination Network                                                       |
| Adeline        | Lautissier      | Initiative 5% - France Expertise Internationale                                                |
| Clarisse       | Veylon          | Initiative 5% - France Expertise Internationale                                                |
| Audrey         | Giret           | Initiative 5% - France Expertise Internationale                                                |
| Néra           | Khamvongsa      | Initiative 5% - France Expertise Internationale                                                |
| Philippe       | Guyant          | Initiative 5% - France Expertise Internationale                                                |
| Mathilde       | De Calan        | Ministère des Affaires étrangères et du Développement international                            |
| H.E. Thierry   | Viteau          | Ambassade de France en Thaïlande                                                               |
| Eric           | Fleutelot       | Ambassade de France en Thaïlande                                                               |
| H.E. Philippe  | MEUNIER         | Ministère des Affaires étrangères et du Développement international                            |
